# Supplementary material for: The one‐stage assay or chromogenic assay to monitor baseline factor VIII levels and desmopressin effect in non‐severe haemophilia A: Superiority or non‐inferiority?
Source: PubMed Central journal article supplement — Haemophilia. 2020 Jul 26;26(5):916–22. doi: 10.1111/hae.14106 (PMC7590113; doi:10.1111/hae.14106), 2020-07-26
Supplement: HAE-26-916-s001.pdf [file HAE-26-916-s001.pdf]

Supplementary Data 4 – Individual desmopressin administrations

9

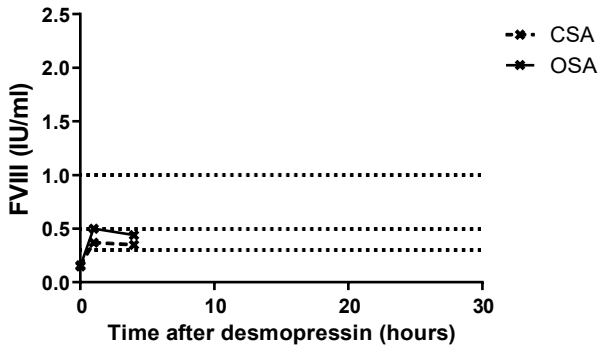

108

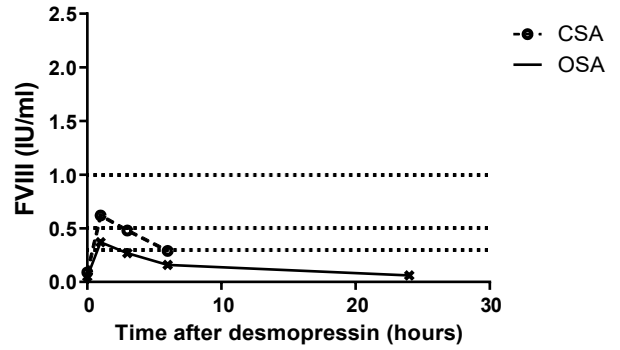

109

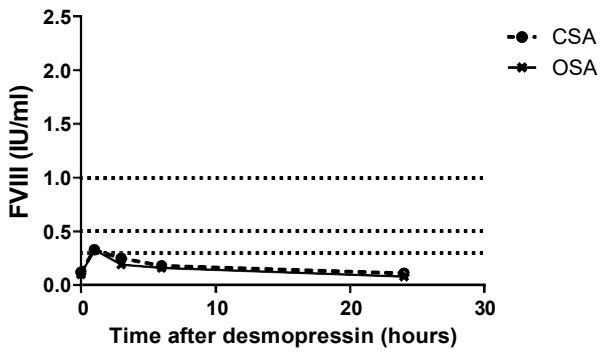

110

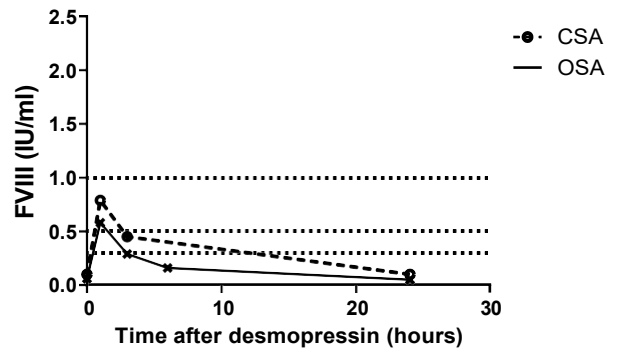

111

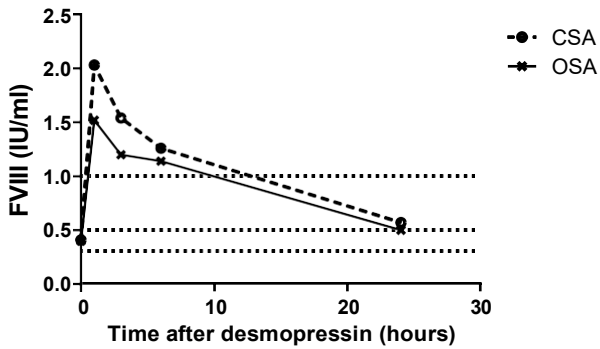

112

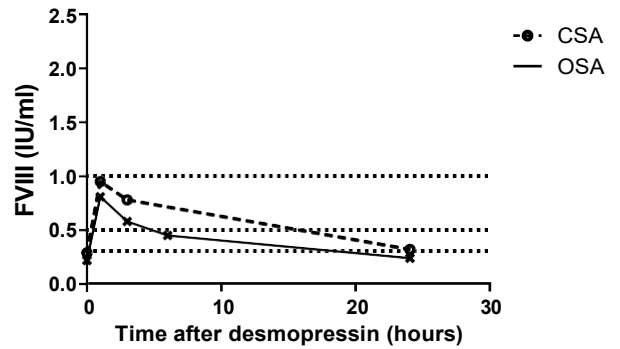

114

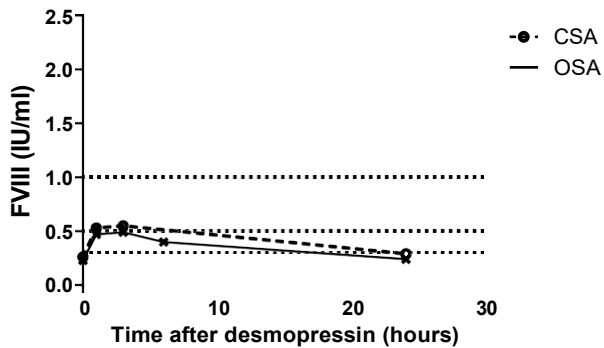

116

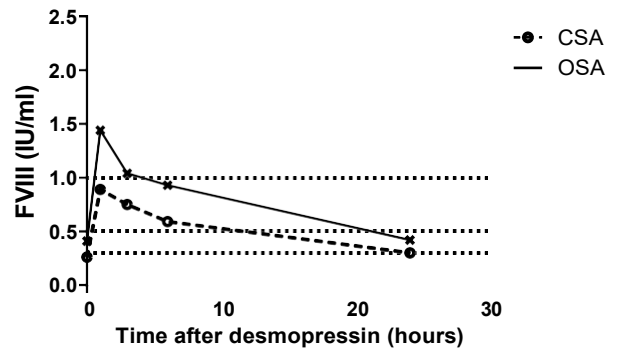

117

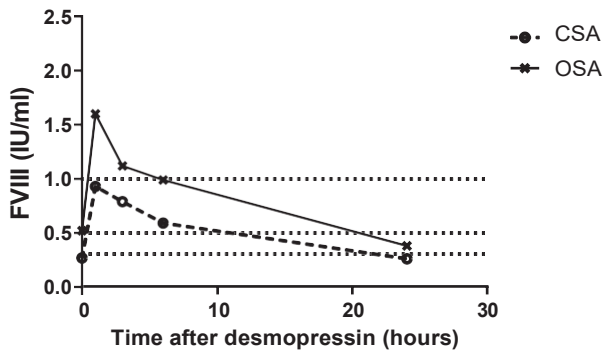

118

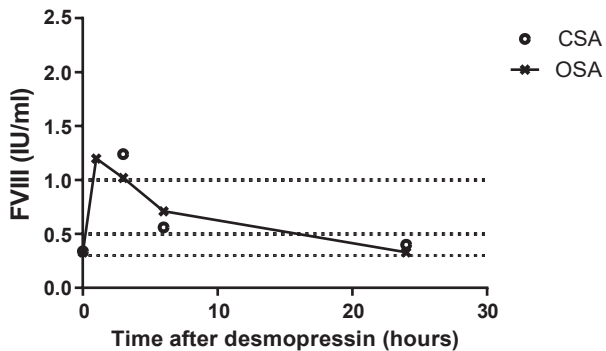

119

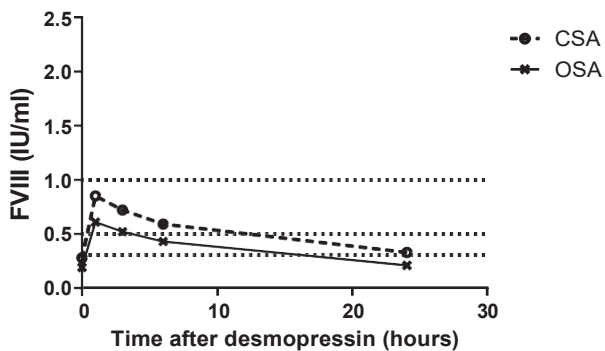

120

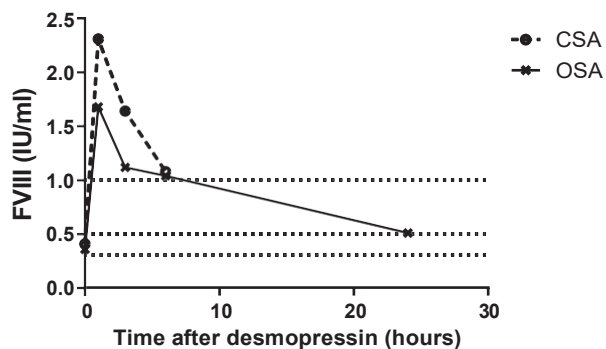

122

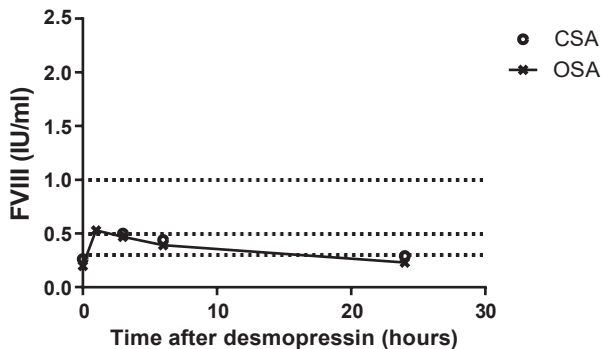

125

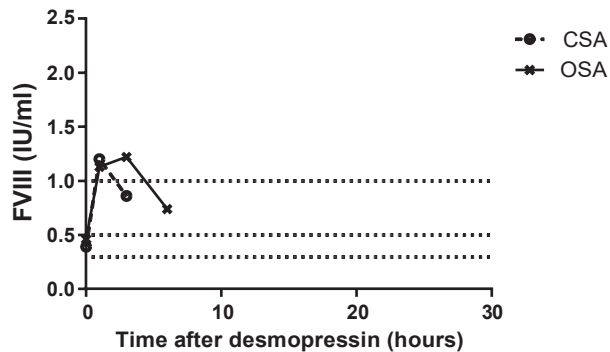

129

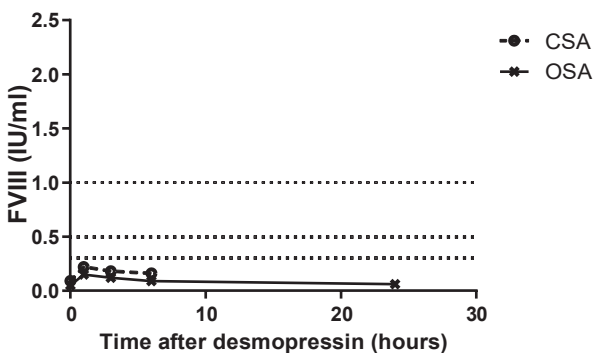

132

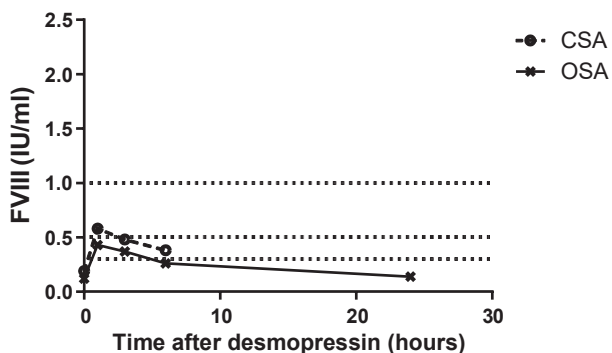

133

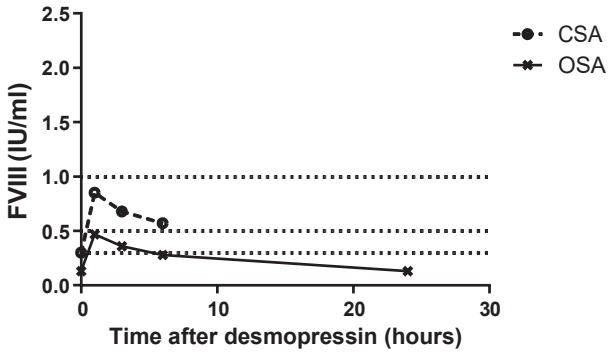

134

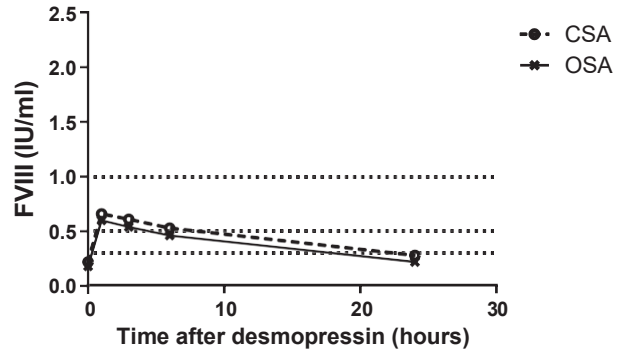

135

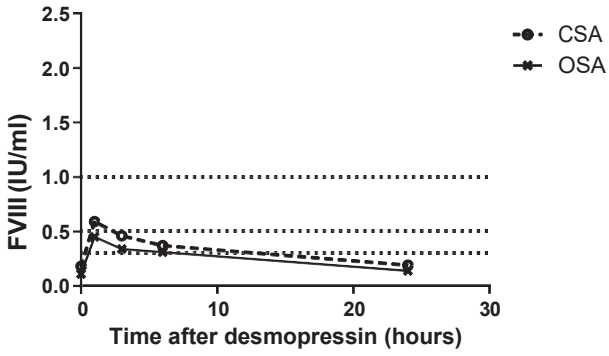

139

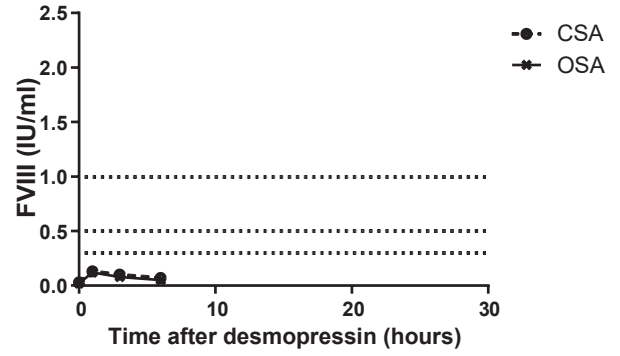

140

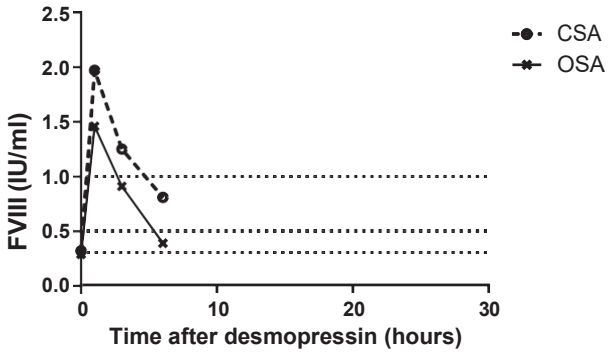

141

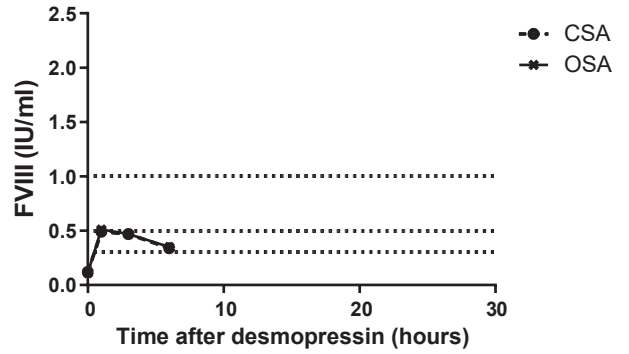

142

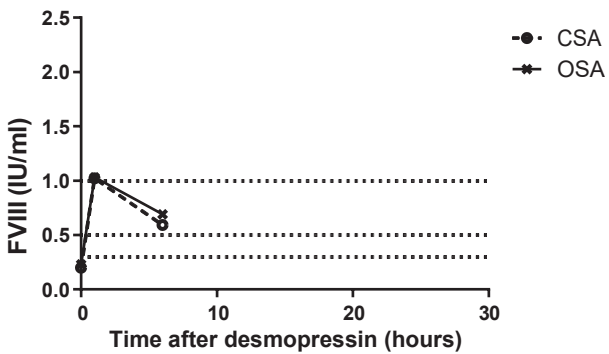

143

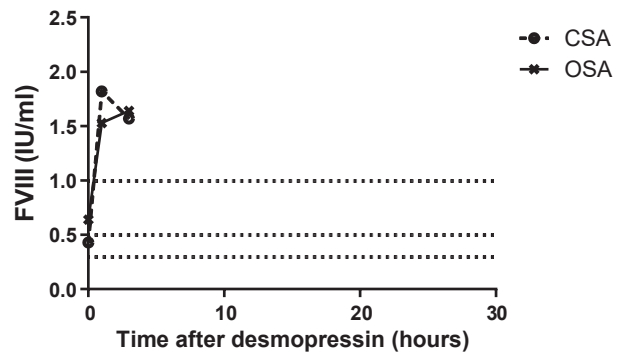

144

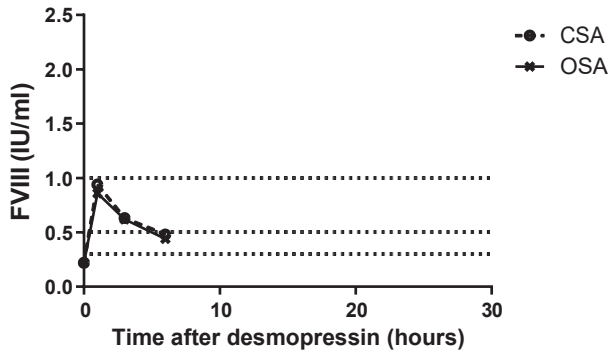

145

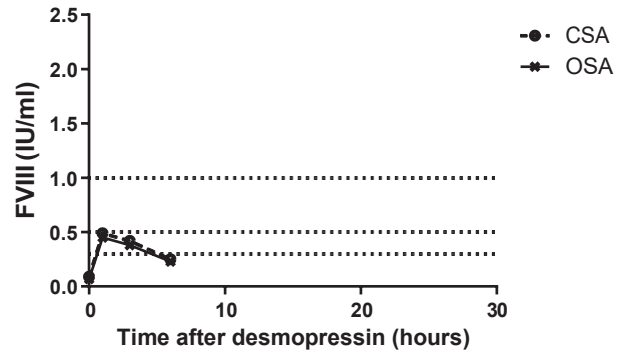

146

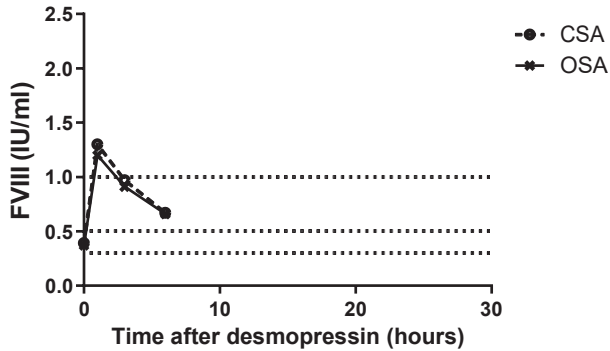

Individual FVIII measurements of all 27 patients receiving desmopressin measured by the one-stage assay (OSA; solid lines) and by the chromogenic assay (CSA; dashed lines). Lines were not depicted if time points were not consecutive. T0 is before desmopressin, all other time points are after the end of desmopressin administration. Dotted horizontal lines represent partial response (PR, 0.30 IU/ml), complete response (CR, 0.50 IU/ml) and 1.0 IU/ml.
