# Supplementary material for: The one‐stage assay or chromogenic assay to monitor baseline factor VIII levels and desmopressin effect in non‐severe haemophilia A: Superiority or non‐inferiority?
Source: PubMed Central journal article supplement — Haemophilia. 2020 Jul 26;26(5):916–22. doi: 10.1111/hae.14106 (PMC7590113; doi:10.1111/hae.14106), 2020-07-26
Supplement: HAE-26-916-s002.pdf [file HAE-26-916-s002.pdf]

Supplementary Data 1 – Number of treated bleedings per FVIII category

a) Measured by the one-stage FVIII assay

| <b>FVIII</b>          | <b>≤0.05</b> | <b>0.06-<br/>0.10</b> | <b>0.11-<br/>0.15</b> | <b>0.16-<br/>0.20</b> | <b>0.21-<br/>0.25</b> | <b>0.26-<br/>0.30</b> | <b>0.31-<br/>0.35</b> | <b>0.36-<br/>0.40</b> | <b>&gt;0.40</b> | <b>Total</b> |
|-----------------------|--------------|-----------------------|-----------------------|-----------------------|-----------------------|-----------------------|-----------------------|-----------------------|-----------------|--------------|
| <i>Patients</i>       | <b>34</b>    | <b>35</b>             | <b>11</b>             | <b>23</b>             | <b>7</b>              | <b>3</b>              | <b>2</b>              | <b>2</b>              | <b>9</b>        | <b>126</b>   |
| <i>Years (total)</i>  | <b>146</b>   | <b>160</b>            | <b>34</b>             | <b>86</b>             | <b>26</b>             | <b>14</b>             | <b>8</b>              | <b>5</b>              | <b>28</b>       | <b>507</b>   |
| Muscle                | 25           | 29                    | 3                     | 17                    | 0                     | 1                     | 1                     | 0                     | 0               | <b>76</b>    |
| Joint                 | 68           | 40                    | 6                     | 3                     | 0                     | 1                     | 0                     | 0                     | 1               | <b>119</b>   |
| Oral                  | 5            | 6                     | 0                     | 1                     | 0                     | 0                     | 0                     | 0                     | 0               | <b>12</b>    |
| Gastro-intestinal     | 5            | 9                     | 0                     | 0                     | 0                     | 0                     | 0                     | 0                     | 0               | <b>14</b>    |
| Epistaxis             | 2            | 17                    | 0                     | 2                     | 0                     | 0                     | 0                     | 0                     | 4               | <b>25</b>    |
| Cerebral              | 0            | 0                     | 0                     | 0                     | 0                     | 1                     | 0                     | 0                     | 0               | <b>1</b>     |
| Other                 | 59           | 36                    | 5                     | 10                    | 2                     | 0                     | 0                     | 0                     | 5               | <b>117</b>   |
| <b>Total</b>          | <b>164</b>   | <b>137</b>            | <b>14</b>             | <b>33</b>             | <b>2</b>              | <b>3</b>              | <b>1</b>              | <b>0</b>              | <b>10</b>       | <b>364</b>   |
| Bleedings/<br>patient | 4,82         | 3,91                  | 1,27                  | 1,43                  | 0,29                  | 1                     | 0,5                   | 0                     | 1,11            |              |
| Bleedings/<br>year    | 1,12         | 0,86                  | 0,41                  | 0,38                  | 0,08                  | 0,21                  | 0,13                  | 0                     | 0,36            |              |

b) Measured by the chromogenic FVIII assay

| <b>FVIII</b>          | <b>≤0.05</b> | <b>0.06-<br/>0.10</b> | <b>0.11-<br/>0.15</b> | <b>0.16-<br/>0.20</b> | <b>0.21-<br/>0.25</b> | <b>0.26-<br/>0.30</b> | <b>0.31-<br/>0.35</b> | <b>0.36-<br/>0.40</b> | <b>&gt;0.40</b> | <b>Total</b> |
|-----------------------|--------------|-----------------------|-----------------------|-----------------------|-----------------------|-----------------------|-----------------------|-----------------------|-----------------|--------------|
| <i>Patients</i>       | <b>6</b>     | <b>41</b>             | <b>30</b>             | <b>16</b>             | <b>13</b>             | <b>8</b>              | <b>2</b>              | <b>2</b>              | <b>8</b>        | <b>126</b>   |
| <i>Years (total)</i>  | <b>27</b>    | <b>181</b>            | <b>130</b>            | <b>48</b>             | <b>56</b>             | <b>28</b>             | <b>9</b>              | <b>9</b>              | <b>19</b>       | <b>507</b>   |
| Muscle                | 2            | 24                    | 42                    | 3                     | 4                     | 0                     | 0                     | 1                     | 0               | <b>76</b>    |
| Joint                 | 18           | 59                    | 28                    | 8                     | 5                     | 0                     | 0                     | 1                     | 0               | <b>119</b>   |
| Oral                  | 1            | 6                     | 5                     | 0                     | 0                     | 0                     | 0                     | 0                     | 0               | <b>12</b>    |
| Gastro-intestinal     | 5            | 2                     | 7                     | 0                     | 0                     | 0                     | 0                     | 0                     | 0               | <b>14</b>    |
| Epistaxis             | 0            | 1                     | 20                    | 0                     | 0                     | 4                     | 0                     | 0                     | 0               | <b>25</b>    |
| Cerebral              | 0            | 0                     | 0                     | 1                     | 0                     | 0                     | 0                     | 0                     | 0               | <b>1</b>     |
| Other                 | 22           | 57                    | 19                    | 3                     | 8                     | 4                     | 0                     | 1                     | 3               | <b>117</b>   |
| <b>Total</b>          | <b>48</b>    | <b>149</b>            | <b>121</b>            | <b>15</b>             | <b>17</b>             | <b>8</b>              | <b>0</b>              | <b>3</b>              | <b>3</b>        | <b>364</b>   |
| Bleedings/<br>patient | 8            | 3,63                  | 4,03                  | 0,94                  | 1,31                  | 1                     | 0                     | 1,5                   | 0,38            |              |
| Bleedings/<br>year    | 1,78         | 0,82                  | 0,93                  | 0,31                  | 0,30                  | 0,29                  | 0                     | 0,33                  | 0,16            |              |

Number of bleedings per patient category according to their FVIII measured by the one-stage assay (a) or by the chromogenic assay (b). Years are years of follow-up. Only bleedings treated with desmopressin, factor concentrate or a (surgical) intervention were included.

Supplementary Data 2 – Number of measurements per time point

|                          | T0 | T1 | T3/T4 | T6 | T24 |
|--------------------------|----|----|-------|----|-----|
| <b>One-stage assay</b>   | 27 | 25 | 26    | 25 | 17  |
| <b>Chromogenic assay</b> | 27 | 25 | 26    | 21 | 12  |

Number of FVIII measurements at each time point by the one-stage assay (OSA) and the chromogenic assay (CSA). T0 is before desmopressin administration T1-T24; time after the end of desmopressin infusion in hours.

Supplementary Data 3 – Differences in FVIII response after desmopressin

a)

| <b>All patients</b>                              |              | <b>Response according to the chromogenic assay</b> |    |    |                 |
|--------------------------------------------------|--------------|----------------------------------------------------|----|----|-----------------|
|                                                  |              | NR                                                 | PR | CR | Total           |
| <b>Response according to the one-stage assay</b> | NR           | 2                                                  | 0  | 0  | 2               |
|                                                  | PR           | 0                                                  | 2  | 5  | 7               |
|                                                  | CR           | 0                                                  | 2  | 14 | 16              |
|                                                  | <b>Total</b> | 2                                                  | 4  | 19 | 25 <sup>1</sup> |

b)

| <b>Selected patients</b>                         |              | <b>Response according to the chromogenic assay</b> |    |    |                 |
|--------------------------------------------------|--------------|----------------------------------------------------|----|----|-----------------|
|                                                  |              | NR                                                 | PR | CR | Total           |
| <b>Response according to the one-stage assay</b> | NR           | 0                                                  | 0  | 0  | 0               |
|                                                  | PR           | 0                                                  | 0  | 3  | 3               |
|                                                  | CR           | 0                                                  | 1  | 9  | 10              |
|                                                  | <b>Total</b> | 0                                                  | 1  | 12 | 13 <sup>2</sup> |

Categorical response one hour after desmopressin administration. All patients are shown in 3a. In 3b) only patients are shown in whom not all FVIII's were either discrepant or equivalent (b). OSA = one-stage assay; CSA = chromogenic assay; NR = no response (FVIII <0.30 IU/ml); PR = partial response (FVIII ≥0.30 and FVIII <0.50 IU/ml); CR = complete response (FVIII ≥0.50 IU/ml) <sup>1</sup>Two missing <sup>2</sup>One missing
